# Supplementary material
Source: MDPI journal article supplement (https://www.mdpi.com/1424-2818/14/4/273)
Supplement: s1 [file s1]

## Supporting Information

**Table S1.** Pelagic fish assemblage of the Saint Peter and Saint Paul's Archipelago. Families are in phylogenetic order according to Nelson *et al.* (2016). Trophic groups are following Pinheiro *et al.* (2018). Relative abundance (MaxN) and mean (MMaxN;  $\pm$  standard deviation) relative abundance of the fish species.

| Family / Species                | Trophic group | MaxN | MMaxN           |
|---------------------------------|---------------|------|-----------------|
| <b>Carcharhinidae</b>           |               |      |                 |
| <i>Carcharhinus falciformis</i> | Carnivores    | 4    | $0.8 \pm 1.1$   |
| <b>Myliobatidae</b>             |               |      |                 |
| <i>Mobula tarapacana</i>        | Planktivores  | 2    | $0.4 \pm 0.9$   |
| <b>Coryphaenidae</b>            |               |      |                 |
| <i>Coryphaena hippurus</i>      | Carnivores    | 1    | $0.2 \pm 0.5$   |
| <b>Carangidae</b>               |               |      |                 |
| <i>Caranx crysos</i>            | Carnivores    | 87   | $17.4 \pm 32.4$ |
| <i>Caranx lugubris</i>          | Carnivores    | 9    | $1.8 \pm 4.0$   |
| <i>Elagatis bipinnulata</i>     | Carnivores    | 153  | $30.6 \pm 34.9$ |
| <i>Seriola rivoliana</i>        | Carnivores    | 12   | $2.4 \pm 3.9$   |
| <b>Sphyraenidae</b>             |               |      |                 |
| <i>Sphyraena barracuda</i>      | Carnivores    | 4    | $0.8 \pm 1.3$   |
| <b>Scombridae</b>               |               |      |                 |
| <i>Acanthocybium solandri</i>   | Carnivores    | 10   | $2.0 \pm 1.2$   |
| <i>Thunnus albacares</i>        | Carnivores    | 2    | $0.4 \pm 0.9$   |
| <b>Balistidae</b>               |               |      |                 |
| <i>Canthidermis maculata</i>    | Planktivores  | 35   | $7.0 \pm 12.5$  |
| <i>Canthidermis sufflamen</i>   | Planktivores  | 27   | $5.4 \pm 7.9$   |
| <i>Melichthys niger</i>         | Omnivores     | 100  | $20.0 \pm 44.7$ |
| <b>Monacanthidae</b>            |               |      |                 |
| <i>Aluterus monoceros</i>       | Omnivores     | 1    | $0.2 \pm 0.5$   |

**Table S2.** Mesophotic reef fish assemblage of the Saint Peter and Saint Paul's Archipelago. Families are in phylogenetic order according to Nelson *et al.* (2016). Trophic groups are following Pinheiro *et al.* (2018). Relative abundance (MaxN) and mean (MMaxN;  $\pm$  standard deviation) relative abundance of the fish species.

| Family / Species                  | Trophic group               | MaxN | MMaxN             |
|-----------------------------------|-----------------------------|------|-------------------|
| <b>Carcharhinidae</b>             |                             |      |                   |
| <i>Carcharhinus falciformis</i>   | Carnivores                  | 1    | $0.07 \pm 0.27$   |
| <i>Carcharhinus galapagensis</i>  | Carnivores                  | 1    | $0.07 \pm 0.27$   |
| <b>Myliobatidae</b>               |                             |      |                   |
| <i>Mobula tarapacana</i>          | Planktivores                | 21   | $1.50 \pm 5.06$   |
| <b>Muraenidae</b>                 |                             |      |                   |
| <i>Enchelycore nigricans</i>      | Carnivores                  | 18   | $1.29 \pm 1.07$   |
| <i>Enchelycore cf. nycturanus</i> | Carnivores                  | 8    | $0.57 \pm 0.85$   |
| <i>Gymnothorax funebris</i>       | Carnivores                  | 8    | $0.57 \pm 0.85$   |
| <i>Muraena melanotis</i>          | Carnivores                  | 9    | $0.64 \pm 0.63$   |
| <i>Muraena pavonina</i>           | Carnivores                  | 28   | $2.00 \pm 1.04$   |
| <b>Holocentridae</b>              |                             |      |                   |
| <i>Holocentrus adscensionis</i>   | Mobile invertebrate feeders | 4    | $0.29 \pm 0.61$   |
| <i>Myripristis jacobus</i>        | Planktivores                | 1    | $0.07 \pm 0.27$   |
| <b>Pomacentridae</b>              |                             |      |                   |
| <i>Chromis vanbeebberae</i>       | Planktivores                | 123  | $8.79 \pm 16.00$  |
| <i>Azurina multilineata</i>       | Planktivores                | 209  | $14.93 \pm 17.90$ |

|                                   |                              |     |               |
|-----------------------------------|------------------------------|-----|---------------|
| <i>Abudefduf saxatilis</i>        | Omnivores                    | 26  | 1.86 ± 3.23   |
| <i>Stegastes sanctipauli</i>      | Territorial herbivores       | 53  | 3.79 ± 5.63   |
| <b>Carangidae</b>                 |                              |     |               |
| <i>Caranx crysos</i>              | Carnivores                   | 38  | 2.71 ± 10.20  |
| <i>Carangoides bartholomaei</i>   | Carnivores                   | 4   | 0.29 ± 0.61   |
| <i>Caranx lugubris</i>            | Carnivores                   | 85  | 6.07 ± 8.68   |
| <i>Seriola rivoliana</i>          | Carnivores                   | 90  | 6.43 ± 12.10  |
| <b>Sphyraenidae</b>               |                              |     |               |
| <i>Sphyraena barracuda</i>        | Carnivores                   | 2   | 0.14 ± 0.36   |
| <b>Aulostomidae</b>               |                              |     |               |
| <i>Aulostomus strigosus</i>       | Carnivores                   | 10  | 0.71 ± 0.73   |
| <b>Dactylopteridae</b>            |                              |     |               |
| <i>Dactylopterus volitans</i>     | Mobile invertebrate feeders  | 1   | 0.07 ± 0.27   |
| <b>Labridae</b>                   |                              |     |               |
| <i>Bodianus insularis</i>         | Mobile invertebrate feeders  | 18  | 1.29 ± 0.91   |
| <i>Clepticus brasiliensis</i>     | Planktivores                 | 1   | 0.07 ± 0.27   |
| <i>Halichoeres radiatus</i>       | Mobile invertebrate feeders  | 22  | 1.57 ± 1.02   |
| <b>Kyphosidae</b>                 |                              |     |               |
| <i>Kyphosus</i> sp.               | Roving herbivores            | 17  | 1.21 ± 3.29   |
| <b>Epinephelidae</b>              |                              |     |               |
| <i>Cephalopholis fulva</i>        | Carnivores                   | 2   | 0.14 ± 0.36   |
| <b>Serranidae</b>                 |                              |     |               |
| <i>Choranthias salmopunctatus</i> | Planktivores                 | 7   | 0.50 ± 1.09   |
| <i>Rypticus saponaceus</i>        | Carnivores                   | 12  | 0.86 ± 0.77   |
| <b>Chaetodontidae</b>             |                              |     |               |
| <i>Chaetodon striatus</i>         | Sessile invertebrate feeders | 4   | 0.29 ± 0.61   |
| <i>Prognathodes obliquus</i>      | Sessile invertebrate feeders | 27  | 1.93 ± 2.09   |
| <b>Pomacanthidae</b>              |                              |     |               |
| <i>Holacanthus ciliaris</i>       | Sessile invertebrate feeders | 29  | 2.07 ± 1.64   |
| <i>Pomacanthus paru</i>           | Sessile invertebrate feeders | 2   | 0.14 ± 0.36   |
| <b>Lutjanidae</b>                 |                              |     |               |
| <i>Lutjanus jocu</i>              | Carnivores                   | 2   | 0.14 ± 0.36   |
| <b>Balistidae</b>                 |                              |     |               |
| <i>Balistes capriscus</i>         | Mobile invertebrate feeders  | 27  | 1.93 ± 1.73   |
| <i>Canthidermis sufflamen</i>     | Planktivores                 | 14  | 1.00 ± 2.04   |
| <i>Melichthys niger</i>           | Omnivores                    | 808 | 57.71 ± 23.60 |
| <i>Xanthichthys ringens</i>       | Mobile invertebrate feeders  | 1   | 0.07 ± 0.27   |
| <b>Monacanthidae</b>              |                              |     |               |
| <i>Aluterus monoceros</i>         | Omnivores                    | 8   | 0.57 ± 2.14   |
| <i>Aluterus scriptus</i>          | Omnivores                    | 8   | 0.57 ± 0.65   |
| <i>Cantherhines macrocerus</i>    | Omnivores                    | 24  | 1.71 ± 0.83   |
| <b>Diodontidae</b>                |                              |     |               |
| <i>Diodon hystrix</i>             | Sessile invertebrate feeders | 1   | 0.07 ± 0.27   |

**Table S3.** Generalized additive model results showing the correlations between the PCO axis 1 and 2 with depth, for the taxonomic structure (species MaxN) of the mesophotic reef fish assemblage.

| PCO1      | Estimate | SE      | t value | P     |
|-----------|----------|---------|---------|-------|
| Intercept | 0.03462  | 4.50094 | 0.008   | 0.994 |
| Depth     | 1.763    | 2.181   | 2.49    | 0.127 |
| PCO2      | Estimate | SE      | t value | P     |
| Intercept | 0.2975   | 4.0296  | 0.074   | 0.942 |
| Depth     | 1        | 1       | 1.137   | 0.307 |

**Table S4.** Generalized additive model results showing the correlations between the PCO axis 1 and 2 with depth, for the trophic structure (trophic group MaxN) of the mesophotic reef fish assemblage.

| PCO1      | Estimate                | SE    | t value | P     |
|-----------|-------------------------|-------|---------|-------|
| Intercept | 5.31*10 <sup>-12</sup>  | 3202  | 0       | 1     |
| Depth     | 1.269                   | 1.487 | 0.734   | 0.372 |
| PCO2      | Estimate                | SE    | t value | P     |
| Intercept | 8.429*10 <sup>-09</sup> | 2404  | 0       | 1     |
| Depth     | 1.903                   | 2.353 | 1.004   | 0.509 |

**Table S5.** Results of the Similarity Percentage (SIMPER) analysis showing the species contributions (70% cumulative) for the pelagic, mesophotic reef and overall fish assemblages of the Saint Peter and Saint Paul's Archipelago.

| Species                                                       | Average Abundance | Average Similarity | Similarity standard deviation | Contribution (%) | Cumulative contribution (%) |
|---------------------------------------------------------------|-------------------|--------------------|-------------------------------|------------------|-----------------------------|
| <b>Pelagic assemblage (Average similarity: 41.64)</b>         |                   |                    |                               |                  |                             |
| <i>Elagatis bipinnulata</i>                                   | 1.99              | 15.41              | 2.54                          | 37.00            | 37.00                       |
| <i>Acanthocybium solandri</i>                                 | 1.00              | 8.84               | 1.11                          | 21.24            | 58.24                       |
| <i>Caranx crysos</i>                                          | 1.37              | 6.77               | 1.12                          | 16.25            | 74.49                       |
| <b>Mesophotic reef assemblage (Average similarity: 58.35)</b> |                   |                    |                               |                  |                             |
| <i>Melichthys niger</i>                                       | 2.71              | 11.28              | 4.93                          | 19.34            | 19.34                       |
| <i>Caranx lugubris</i>                                        | 1.42              | 5.42               | 4.82                          | 9.29             | 28.63                       |
| <i>Muraena pavonina</i>                                       | 1.11              | 4.02               | 2.25                          | 6.88             | 35.51                       |
| <i>Cantherhines macrocerus</i>                                | 1.07              | 3.89               | 2.31                          | 6.67             | 42.18                       |
| <i>Chromis multilineata</i>                                   | 1.41              | 3.60               | 0.96                          | 6.18             | 48.36                       |
| <i>Holacanthus ciliaris</i>                                   | 1.03              | 3.31               | 1.54                          | 5.68             | 54.04                       |
| <i>Halichoeres radiatus</i>                                   | 0.98              | 3.17               | 1.54                          | 5.44             | 59.48                       |
| <i>Seriola rivoliana</i>                                      | 1.10              | 2.82               | 0.93                          | 4.84             | 64.32                       |
| <i>Bodianus insularis</i>                                     | 0.88              | 2.71               | 1.20                          | 4.65             | 68.97                       |
| <i>Balistes capriscus</i>                                     | 0.89              | 2.27               | 0.95                          | 3.90             | 72.87                       |
| <b>Overall assemblage (Average similarity: 37.24)</b>         |                   |                    |                               |                  |                             |
| <i>Melichthys niger</i>                                       | 2.17              | 7.21               | 1.18                          | 19.36            | 19.36                       |
| <i>Caranx lugubris</i>                                        | 1.14              | 3.49               | 1.18                          | 9.37             | 28.73                       |
| <i>Seriola rivoliana</i>                                      | 0.97              | 2.44               | 0.74                          | 6.56             | 35.29                       |
| <i>Muraena pavonina</i>                                       | 0.82              | 2.14               | 0.89                          | 5.74             | 41.03                       |
| <i>Cantherhines macrocerus</i>                                | 0.79              | 2.07               | 0.90                          | 5.56             | 46.59                       |
| <i>Chromis multilineata</i>                                   | 1.04              | 1.92               | 0.58                          | 5.15             | 51.74                       |
| <i>Holacanthus ciliaris</i>                                   | 0.76              | 1.76               | 0.77                          | 4.74             | 56.48                       |
| <i>Halichoeres radiatus</i>                                   | 0.72              | 1.69               | 0.77                          | 4.54             | 61.02                       |
| <i>Bodianus insularis</i>                                     | 0.65              | 1.44               | 0.68                          | 3.88             | 64.89                       |
| <i>Balistes capriscus</i>                                     | 0.66              | 1.21               | 0.58                          | 3.25             | 68.14                       |
| <i>Enchelycore nigricans</i>                                  | 0.60              | 1.18               | 0.59                          | 3.17             | 71.32                       |

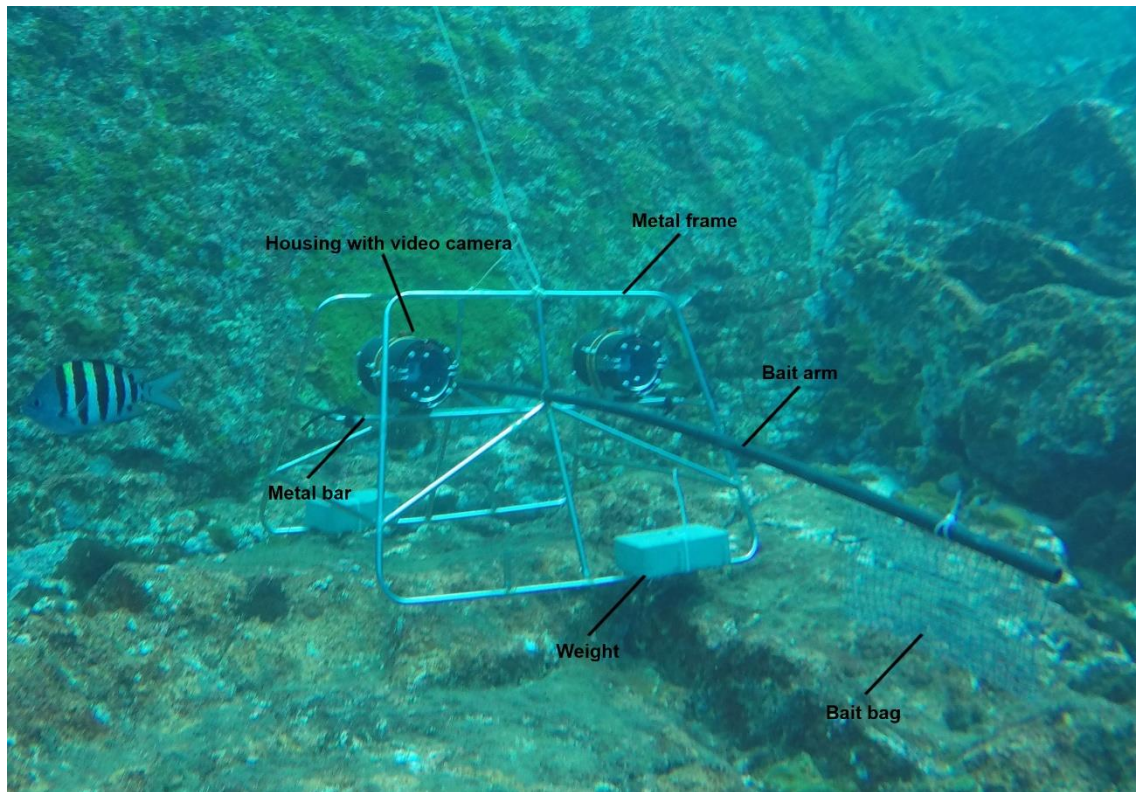

**Figure S1.** Baited remote underwater stereo-video system used in this study.
